# Supplementary material for: Janus dendritic silica/carbon@Pt nanomotors with multiengines for H2O2, near-infrared light and lipase powered propulsion
Source: Royal Society of Chemistry journal article supplement (doi:10.1039/d0sm01355b), 2020-01-01
Supplement: d0sm01355b1.pdf [file d0sm01355b1.pdf]

## Supporting Information

Janus Dendritic Silica/Carbon@Pt Nanomotors with Multiengines for H<sub>2</sub>O<sub>2</sub>, Near-Infrared Light and Lipase Powered Propulsion

Yi Xing, Xin Du\*, Tailin Xu\*, and Xueji Zhang\*

Research Center for Bioengineering and Sensing Technology, Beijing Key  
Laboratory for Bioengineering and Sensing Technology, Department of Chemistry  
& Biological Engineering, University of Science & Technology Beijing, Beijing  
100083, China

\*Corresponding Authors

E-mail addresses: [duxin@ustb.edu.cn](mailto:duxin@ustb.edu.cn); [xutailin@ustb.edu.cn](mailto:xutailin@ustb.edu.cn); [zhangxueji@ustb.edu.cn](mailto:zhangxueji@ustb.edu.cn)

## SUPPORTING METHODS

### Reagents

Tetraethyl orthosilicate (TEOS,  $\geq 99\%$ ), 3-aminopropyltriethoxysilane (APTES,  $\geq 98\%$ ), triethanolamine (TEA,  $\geq 99\%$ ), cetyltrimethylammonium tosylate (CTAT,  $\geq 98\%$ ), potassium tetrachloroplatinate (II) ( $K_2PtCl_4$ ) and lipase (from *Candida Rugose*, Type VII,  $\geq 700$  unit/mg solid) were purchased from Sigma Aldrich. Concentrated hydrochloric acid (HCl, 37%), resorcinol, formaldehyde (37.0~40.0%), glycerol triacetate, and absolute ethanol (99.5%) were purchased from Beihua Fine Chemicals. Phosphate buffered saline (PBS) was obtained from Thermo Fisher Scientific Ltd. Hydrogen peroxide ( $H_2O_2$ , 30 wt%) was purchased from Aladdin. Ultrapure water with a resistivity higher than 18.2 M $\Omega$ -cm was used in all experiments and was obtained from a three-stage Millipore Mill-Q Plus 185 purification system (Academic).

### Morphology and structure characterization.

For transmission electron microscopy (TEM) observations, powder samples were added on carbon-coated copper grids and observed on a Hitachi HT-7700 transmission electron microscope at an acceleration voltage of 100 kV. Scanning electron microscopy (SEM) observations were carried out on a Hitachi S-8010 scanning electron microscope operated at 10 kV. Specimens were coated with a layer of gold with a size of 5 nm by ion sputtering before SEM observations.

### Motion characterization of Janus nanomotors.

***H<sub>2</sub>O<sub>2</sub>-motivated motion:*** The  $H_2O_2$  solutions with different mass fractions ranging from 2 % to 6 % were previously prepared and used as chemical fuels. Janus DMS/RF@Pt nanomotors (dispersed in 10  $\mu$ L of DI water) and as-prepared  $H_2O_2$  solutions (10  $\mu$ L) were firstly mixed in a 2 mL capped vial. After uniform mixing, the mixture was added into a groove (5 mm of diameter, 0.5 mm of thickness) on the quartz slide (2 mm thickness) and sealed with a high-clean cover glass (8 mm diameter) to avoid environmental disturbances.

***NIR light-driven motion:*** DMS/RF@Pt nanomotors in 10  $\mu$ L of DI water was added

into a groove (5 mm of diameter, 0.5 mm of thickness) on the quartz slide (2 mm of thickness) and sealed with a high-clean cover glass (8 mm of diameter) to avoid environmental disturbances. A 980-nm fiber-coupled diode laser system was used to provide a gradient NIR light irradiation to trigger the nanomotors. A beam expander (2 cm of diameter) was installed at the laser source, which was inclined to the quartz slide with an angle of 45° and evenly irradiated the groove.

***Lipase-powered motion:*** The triacetin solutions with different concentrations from 2 to 20 mM were previously prepared and used as chemical fuels. Janus DMS/RF@Pt nanomotors (dispersed in 10  $\mu$ L of DI water) and as-prepared triacetin solutions (10  $\mu$ L) were firstly mixed in a 2 mL capped vial. After uniform mixing, the mixture was added into a groove (5 mm of diameter, 0.5 mm of thickness) on the quartz slide (2 mm thickness) and sealed with a high-clean cover glass (8 mm diameter) to avoid environmental disturbances.

All the imaging experiments were recorded at a rate of 9-12 frames per second using a Nikon-U upright microscope, which was equipped with a 100 W halogen tungsten lamp, a 40 X/20 X plan fluor objective and a DS-Ri2 microscope camera. ImageJ and its plug-in (MTrackJ) were conjunctively used to analyze the motion of nanomotors.

## SUPPORTING FIGURES

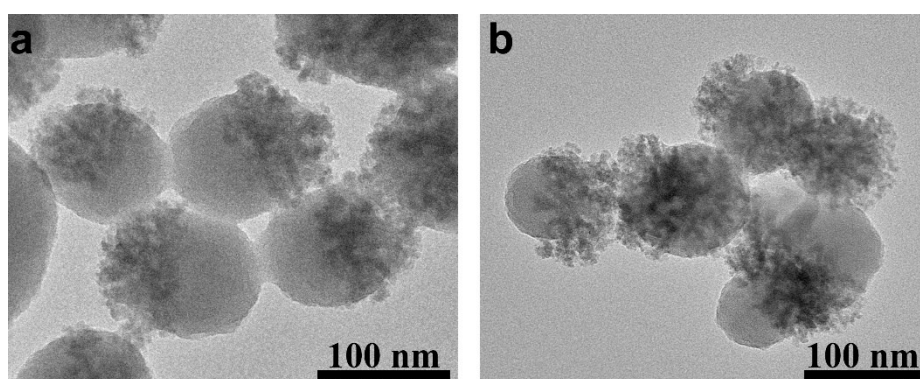

**Fig. S1** TEM images of (a, b) Janus DMS/RF@Pt nanoparticles before carbonization.

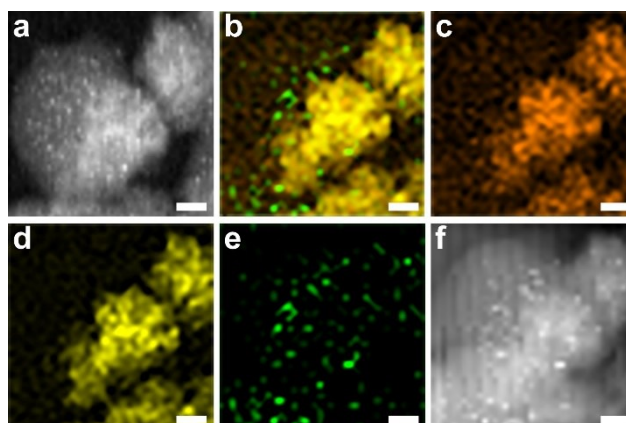

**Fig. S2** (a) STEM images of Janus DMS/C@Pt nanoparticles. EDX mapping analyses of (b) merge, (c) O, (d) Si, (e) Pt. (f) Spectrum image after scanning.

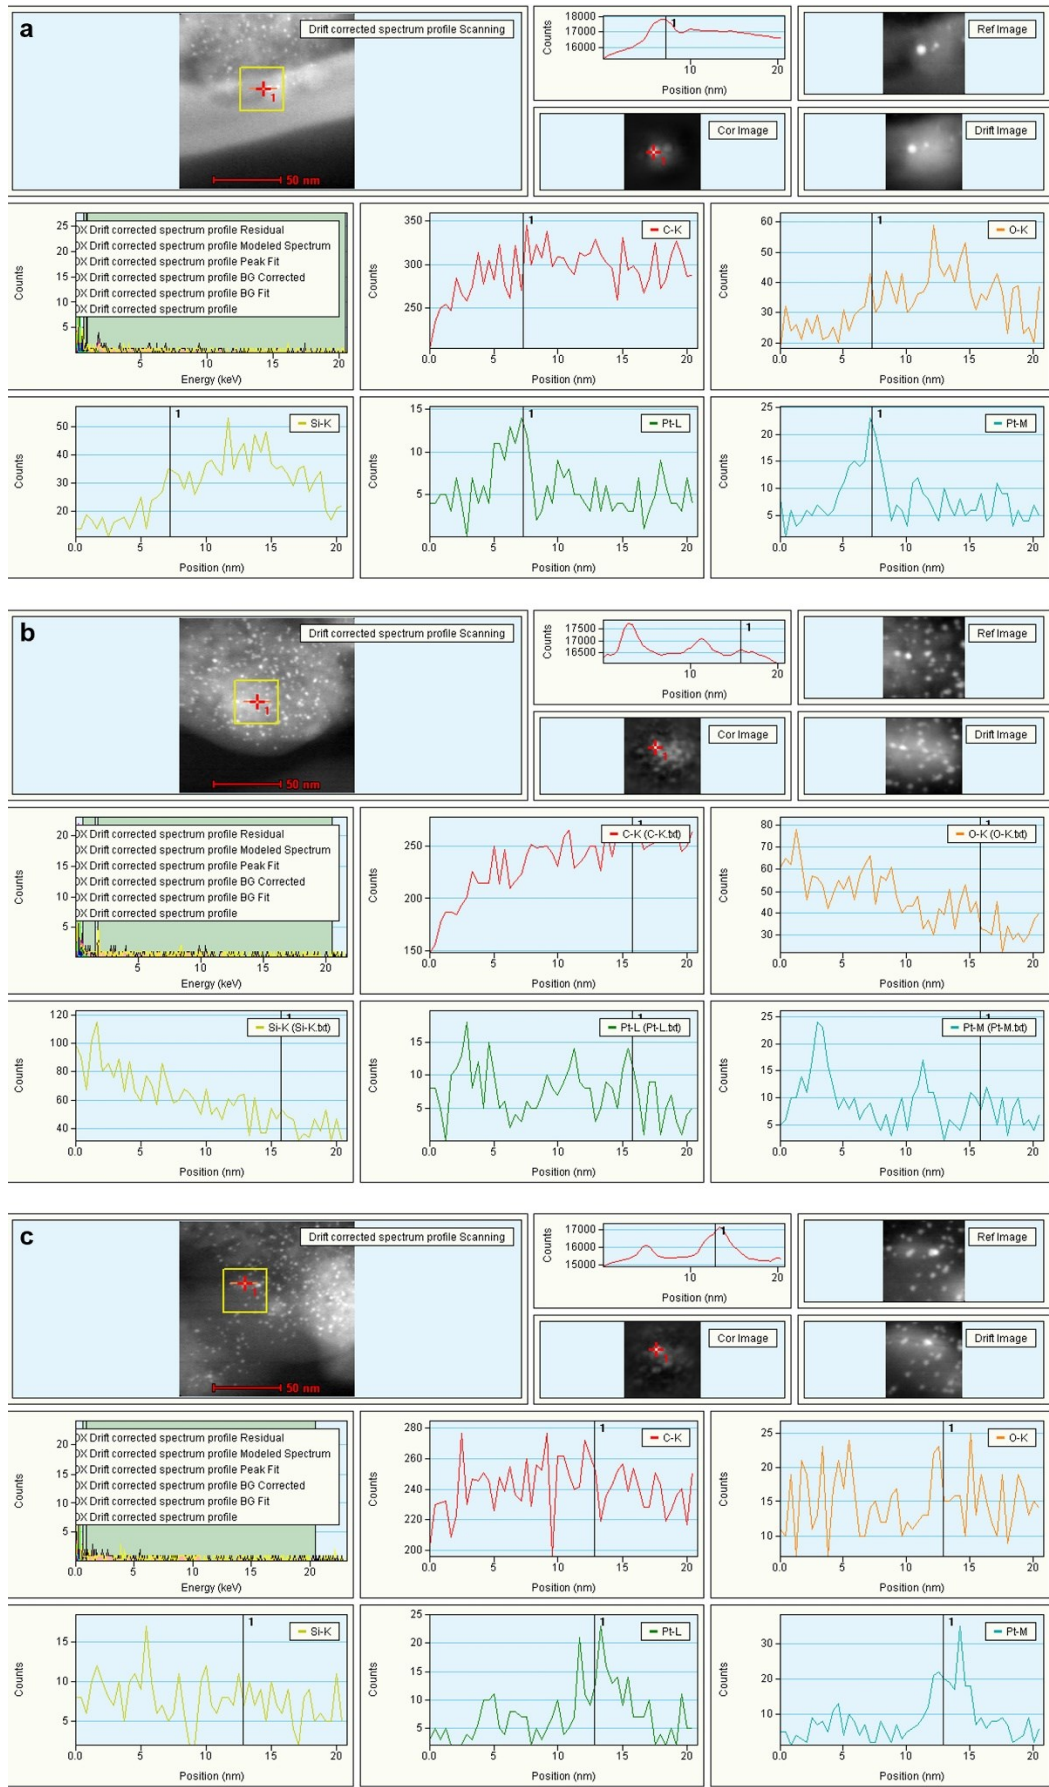

**Fig. S3 (a-c)** EDX analyses by line scan.

## **SUPPORTING VIDEOS**

**Video S1.** Representative motion movie of Janus DMS/C@Pt nanomotors in the 3 % H<sub>2</sub>O<sub>2</sub> solution and corresponding Brownian motion in the absence of H<sub>2</sub>O<sub>2</sub>.

**Video S2.** Representative motion movie of Janus DMS/C@Pt nanomotors upon the NIR laser (980 nm, 1.0 W/cm<sup>2</sup>).

**Video S3.** Comparative motion movie of Janus LDMS/C@Pt nanomotors in the 1 and 10 mM triacetin solutions.
